# Supplementary material for: Urochordate serpins are Classified into Six Groups Encoded by Exon-Intron Structures, Microsynteny and Bayesian Phylogenetic Analyses
Source: PubMed Central journal article supplement — J Genomics. 2014 Sep 1;2:131–40. doi: 10.7150/jgen.9437 (PMC4150122; doi:10.7150/jgen.9437), 2014-09-01
Supplement: jgenv02p0131s1.pdf [file jgenv02p0131s1.pdf]

## Supplementary Material 1

**Supplementary Figure S1: Protein sequence alignment of serpins from *C. intestinalis* and *C. savignyi*.** Signal peptide and reactive center loop (RCL) regions are marked on top. P1-P2 positions of RCL and C-terminal ER-retention signals are marked in red and blue colors, respectively. Amino acid conservations are marked by black, brown and yellow colors, corresponding for 70% or more, 50-69%, and 30-49% identities, respectively.

|            | -----Signal Peptide-----                                                 |     |
|------------|--------------------------------------------------------------------------|-----|
| Hs-A1AT    | -----                                                                    | -   |
| Ci-Spn-4   | -----MFLKQVLVLCVFFFTSSAFYMPMVR-----                                      | 26  |
| Ci-Spn-3   | -----MKLLICSLLLVVIATGYCQNR-----                                          | 22  |
| Cs-Spn-5   | MPILDRLGPSRYAKELQLVNTRAIISLDHLVPTIGLPEVTVLAKMKFVCLLPVPAICFYVQSSG-----    | 64  |
| Ci-Spn-5   | -----MRFIFLCFVLLVSAGFNEAKRTR-----                                        | 23  |
| Ci-Spn-1   | -----MYTASAYGVFLCLAIYQVGATKHLQAEFDYGEYEDDA-----                          | 38  |
| Cs-Spn-4   | -----MGSHMLIRGVILCLVFYEVTCTKHIAEFDYGDYV-DT-----                          | 37  |
| Ci-Spn-2   | -----MLLVIAACMLSAFNGAVGEPYAPTNA-----                                     | 26  |
| Cs-Spn-3   | -----MATIGLTLISALLVLSGQHSIEAYTS-----                                     | 26  |
| Cs-Spn-2   | -----MESYICLVLVSVLIVGGKANTLQTE-----                                      | 26  |
| Ci-Spn-9   | -----MQFLYAIVMILVLDANAKIIDTSE-----                                       | 24  |
| Ci-Spn-10A | -----MQFLYAIVMLLVLDANAKIIDTSE-----                                       | 24  |
| Ci-Spn-10B | -----MQFLYAIVMLLVLDANAKIIDTSE-----                                       | 24  |
| Cs-Spn-1   | -----LFALYSSLIVGITCSMEHI-----                                            | 19  |
| Ci-Spn-7   | -----MAFC-----                                                           | 4   |
| Ci-Spn-6   | -----MAFC-----                                                           | 4   |
| Ci-Spn-8   | -----MAFC-----                                                           | 4   |
|            |                                                                          |     |
| Hs-A1AT    | -EDPOGDAAQKTDTSHHQDHP-----TFNKITPNLAEFAFSLVROLAHQ-SNST-----NIFFSVSTIA    | 58  |
| Ci-Spn-4   | -----THPPQMDMPAYCAEVVNAITRVVSGFILNAATHANSATDEYVAERNVFFSPFGAA             | 80  |
| Ci-Spn-3   | -----WINHFTDNQNTFSGSLYWAISKE-KPNK-----NVLFSPISVS                         | 59  |
| Cs-Spn-5   | -----QFWMKFTNRQNFSGRMVQSVIROQRGK-----NVVFSPIRKS                          | 104 |
| Ci-Spn-5   | -----VISKWRLTAIANKLFAHRLFMEVARTTPEQE-----NFFISPYAVS                      | 64  |
| Ci-Spn-1   | NSWDPRQASITKIGKMDGLTIDQ-VELPPFEKPAARLVNNEAFKLLNEIASD-NE-D-----NVVFSPLSIF | 102 |
| Cs-Spn-4   | YAWDPWQASIAKVGKMDGAAPERPTMPPLEKPAAKILNNEAFKLFNAIATE-NSTE-----NEVFSPLSIF  | 103 |
| Ci-Spn-2   | -----FREPVAHALYDFGMDMYNQLPSWRPTE-----NIVISPMSMY                          | 64  |
| Cs-Spn-3   | -----SAAFRDTTAIALHNGVDLFCFLAPNWRNE-----NVAISPMSMY                        | 67  |
| Cs-Spn-2   | -----HVAKLSEANIEFSLNLYKQLIVE-SNMK-----NVMFSPVSIS                         | 63  |
| Ci-Spn-9   | -----HVEKLSEANIEFSLNLYKQLIEG-DPMK-----NVMFSPVSIT                         | 61  |
| Ci-Spn-10A | -----HVEKLSEANIEFSLNLYKQLIEG-DPMK-----NVMFSPVSIS                         | 61  |
| Ci-Spn-10B | -----HVEKLSEANIEFSLNLYKQLIEG-DPMK-----NVMFSPVSIS                         | 61  |
| Cs-Spn-1   | -----KLSSGLTEFAVALYKEISKD-PG-----NVFLSPFSIS                              | 51  |
| Ci-Spn-7   | -----KVAAAKTDFALGLYKELSQKGDG-----NLFFSPYSIS                              | 37  |
| Ci-Spn-6   | -----KVAAAKTDFALGLYKELSQKEDG-----NLFFSPYSIS                              | 37  |
| Ci-Spn-8   | -----KVAAAKTDFALGLYKELSQKEDG-----NLFFSPYSIS                              | 37  |
|            |                                                                          |     |
| Hs-A1AT    | TAFAMLSLCTKADTHDEILEGTFNFLTETI-----PEAQIHEGFQELLRTLNQ-----PDS-QLOLTGNG   | 117 |
| Ci-Spn-4   | NVVGILRLASAGRTRERFDGLPLF--SSILQ----HNDRFMRGFQTLRSLILSVTSFPGTNPQSDKLLNSG  | 147 |
| Ci-Spn-3   | QTLGMVLAAGMGNLYDEITRALQM--TDL-----TPSRIHTLMRKRTRNVVM-----RPN-GQTVKLANS   | 116 |
| Cs-Spn-5   | -----F--TNV-----ALRHT-----GQTI RLANA                                     | 122 |
| Ci-Spn-5   | AGLSMTLYCAHSTTAREIMDTLGY--TQLSTSGNFNOAKVPRLYQKMLHQVHQ-----KDH-GFELTSVNR  | 127 |
| Ci-Spn-1   | TSLATLRPALNGTSLQLNDVTGL--DTI-----RESDMN-----DMYDGIFK-----KSS-SYKIKQASR   | 155 |
| Cs-Spn-4   | TTLATLRPGLNGNSLLQLDDVTGL--DTI-----EERDMN-----DMYDVVFE-----RST-SHKIKQANR  | 156 |
| Ci-Spn-2   | AILSILLPGLNGASHDOVYNALRM--TNL-----PRNGVDAE-SAMCSKIFQ-----INP-SHYDLTRANR  | 120 |
| Cs-Spn-3   | AVLSILLPGLQGSSYDOVYHALGM--SHL-----DGDGIDRE-SDMCGLVFQ-----ENA-NYELHRANR   | 123 |
| Cs-Spn-2   | AALAMTNLGAKGKTAEQISDAFFF--NKI-----EDGRFHSAFGEHLGLMFD-----KASGNVTVKSSNR   | 121 |
| Ci-Spn-9   | TALAIHLGAKGNTAKOIDDAFMF--SKI-----EDGRFHSAFGEHLGLLFD-----KASEKVTAKSSNR    | 119 |
| Ci-Spn-10A | AALAMTNLGAKGKTAEQIDDAFMF--SKI-----EDGRFHSAFGEHLGLLFD-----KASDNVTVKSSNR   | 119 |
| Ci-Spn-10B | AALAMTNLGAKGKTAEQIDDAFMF--SKI-----EDGRFHSAFGEHLGLLFD-----KASDNVTVKSSNR   | 119 |
| Cs-Spn-1   | TALSMTLLGTQGETREQLFKTLNL--DGV-----SENEINSGFSSLOACL-----KSS-KVILETANQ     | 106 |
| Ci-Spn-7   | TALMMTLGSKKTRREEMLDVGL--KDL-----NESDINSGFLQILHHLRS-----SKG-DVVLEMANK     | 94  |
| Ci-Spn-6   | TALMMTLGSKKTRREEMLDVGL--KDL-----NESDINSGFLQILHHLRS-----SRG-DVVLEMANK     | 94  |
| Ci-Spn-8   | TALMMTLGSKKTRREEMLDVGL--KDL-----NESDINSGFLQILHHLRS-----SRG-DVVLEMANK     | 94  |

|            |                                                                            |     |
|------------|----------------------------------------------------------------------------|-----|
| Hs-A1AT    | LFLSEGLKLVDFKLEVDKLVHSEAFVNFQ-DTEEAKKQINDYVEKGTQGKIVDLVKE--LDRDITVFALVNY   | 187 |
| Ci-Spn-4   | VFTSRWLYLQTRFISDARNFYKAVVASVDFQ-DPELASSHINMWINARLQKIKTKIVSPSDLSPITLVTVFNT  | 219 |
| Ci-Spn-3   | VFIGSNYPVVOQYIDLLRQNYKSSVFPVNFH-NSNAAANMINEWVSNMTEDEKIRELVDPSSITAFTRMILVNA | 188 |
| Cs-Spn-5   | IFVVRDEYVPKQPYIDTLRTYKSAVKTFDVR-NSTAASNLVNRWVASNTEENRITDLVDPSAFTELTRLVLVNA | 194 |
| Ci-Spn-5   | MFGESRNIFVPSYVKGVEHFGAKLKKVDFRRNPERARQENITWVEEVNQTIREALPPNSVTAETLLVLMST    | 200 |
| Ci-Spn-1   | IYVDRGIRLSRSYRTDLYRMKISRARRLDFRRAPESRNQINKYVKKRTRKLIKELVPVGAISSATMMYLVNA   | 228 |
| Cs-Spn-4   | IYVDRSVKLAKKFKKELKNLKLGOARRLDFRRAEQSRKINKYVKKRTRKLIKELVPEGAVSPSTVMYLVNA    | 229 |
| Ci-Spn-2   | IFGDRTLTFKKSFKNETSWHHKAAHKKVDFQHYPNRARRKMNRYVSKMLDCEIQOOLIPREAVTDTTRIFLVNA | 193 |
| Cs-Spn-3   | IYSDLRVQIKKSYKQAAMTHHKSPVKKVDFVLAQRKSRKKMNRYVAKHTNDEITELIPOEAITQDTKIFLVNA  | 196 |
| Cs-Spn-2   | VFANKQRKILEDYKNAL-TVYGAKVESMDFT-SASDAVSHINKWASDATEGKISSMLADDAINGNTALIVANA  | 192 |
| Ci-Spn-9   | VFADKHIIVFEDYQDSL-SVVSATVESVDFK-MPKSAVKKINDWSSDATNGVLSKSMLEEDGVNNDTALLIINA | 190 |
| Ci-Spn-10A | VFADKKRKLVEDYKNAL-TVYGAKLENVDFK-TPSNAVQINDWASDATNGKISSNMLQDDAVDSNTALIVANA  | 190 |
| Ci-Spn-10B | VFADKKRKLVEDYKNAL-TVYGAKLENVDFK-TPSNAVQINDWASDATNGKISSNMLQDDAVDSNTALIVANA  | 190 |
| Cs-Spn-1   | LFPEISFPLEEEFVSKCKQYHGADIKGLDFVGNPENSRNAINQWVENVTKGKITDLL-SGSINSLVRLVIANA  | 178 |
| Ci-Spn-7   | LFPEATYKLEEDFLSKCKQFYETEIQALDFKGNPDASREAINVWAEKETS GKINDLLPNSINSLVRLVLANA  | 167 |
| Ci-Spn-6   | LFPEATYKLEKDFLSKCKEFYETEIQALDFKGNPDASREAINAWAEKETS GKIKDLLPSGSIDSLVRLVLANA | 167 |
| Ci-Spn-8   | LFPEATYKLEKDFLSKCKEFYETEIQALDFKGNPDASREAINAWAEKETS GKIKDLLPSGSIDSLVRLVLANA | 167 |

|            |                                                                       |     |
|------------|-----------------------------------------------------------------------|-----|
| Hs-A1AT    | IFFKGNWERPFEVKDIT-----EEDTEHYDQVTTVKVPM-----KR                        | 223 |
| Ci-Spn-4   | LFFEALWKHPFTTGRIT-----SNSTFVLANGTPVLTTPMMEVTANHFLHY                   | 263 |
| Ci-Spn-3   | VYFQADWAISEFRIPIT-----KQNFSLNNGTTVOVPPM-----VR                        | 223 |
| Cs-Spn-5   | IYFQASWKHKFSAAGILYNSMLYAVFDNGLGYIFKELNFITSSTFQEQFQLANGESVMVPPM-----HL | 259 |
| Ci-Spn-5   | LYFKGLWEKPEINL-----RSTFYTTNNEQYQTFV-----Q                             | 233 |
| Ci-Spn-1   | IYVKAKNDIPFOKSLIT-----RMRRFRVSNNESIRVETM-----IS                       | 264 |
| Cs-Spn-4   | IYVKAKNSIGFSKSHIT-----KMRRFKISDSESRKVPTM-----WN                       | 265 |
| Ci-Spn-2   | IAFKAAWKSSFIKDAIT-----TLTNGEHSPTKVKQAATM-----YT                       | 229 |
| Cs-Spn-3   | IYVKVLWQTSFIRQAIT-----TKANFQISPTRSKQVSTM-----YT                       | 232 |
| Cs-Spn-2   | VYFRGNWHSKFIESQIT-----DRRAFVYVSHYKVVETPPM-----FQ                      | 228 |
| Ci-Spn-9   | LYFRGNWDYEFDEGRIT-----KRRPFYVSKDKAVETSEFM-----FQ                      | 226 |
| Ci-Spn-10A | VYFRGDWHSKFNEMQIT-----ERRAFVYVSHYKIVETPPM-----FQ                      | 226 |
| Ci-Spn-10B | VYFRGDWHSKFNEMQIT-----ERRAFVYVSHYKIVETPPM-----FQ                      | 226 |
| Cs-Spn-1   | VYFKGDWLNPFKEGAT-----VLKDFEHVQKDVTKKVHMM-----NM                       | 214 |
| Ci-Spn-7   | VYFKGSWLHKFKDYDS-----IESNTEHVKEGTTTQVKMM-----NQ                       | 203 |
| Ci-Spn-6   | VYFKGSWLHKFKEQOIT-----TMKDFHIRENKVEKVNM-----FM                        | 203 |
| Ci-Spn-8   | VYFKGSWLHKFKEQOIT-----TMKDFHIRENKVEKVNM-----FM                        | 203 |

Motif I

|            |                                                                            |     |
|------------|----------------------------------------------------------------------------|-----|
| Hs-A1AT    | LGMFN--IQ--HCKKLSWVLLMKVYLG---ATAI--FFLEDEG---KLOHLENE---LTHDIITKFLNED     | 280 |
| Ci-Spn-4   | SGEFCQLFSMRRCHPNTDPDIVLPPYKGE---RROMI--VLIENQNI--TIREIE-R---QFGTNEKWRSSLV  | 325 |
| Ci-Spn-3   | WEAVV--KS--YNYRDKIEFFFIRYKTTSNQNTYFV--VGLPGDNY--NLQOFS-R---EAQQILSRFRNTINK | 284 |
| Cs-Spn-5   | RKML---YT--YFNRIVEFVKLPPYKSLNFTSYFV--VGLPLAGR--SLNQVK-S---NMHRILPRFNSGVW   | 319 |
| Ci-Spn-5   | QTMFA--LHS-FSEQFAHIVELPFKTSSS-RYKVMVMQLILPESRGADNINLIEDQ---FDEENFDFAEDQE   | 299 |
| Ci-Spn-1   | KNTFC--TRV-NNRDLQASVTVLSLGG---FSFV--IMSEHSAG--NFSRFYDDGVTMTQEKMTRAFINKI    | 326 |
| Cs-Spn-4   | PNAFC--THI-NNRRLQASLTVLSLGGK-----GKG-----VRE-----                          | 296 |
| Ci-Spn-2   | SSAVC--FHQSHDAQLES DLIVLPPKGA---KTTMV--FIVEIVAG--NFGPLKGA---VGASKISOALDRYW | 290 |
| Cs-Spn-3   | SSARC--FFQPNYPSLQSDIVLPPKGN---AMSMI--FIVETSPG--NFAPLESA---TASGDLROMMEVW    | 293 |
| Cs-Spn-2   | RGQFK--YA--YIHDLTQIVEMDYAGK---DYSMV--LLMP-ENF--DLAKVEEQ---LNHANITKWLAKLK   | 286 |
| Ci-Spn-9   | NEHFK--YA--YINELTLQVLEMDYAGT---DYSMV--LLMP-ENF--DLAKVEAN---LNHANITKWLAKLK  | 284 |
| Ci-Spn-10A | RGHFK--YA--YISELTLQVLEMDYAGK---DYSMV--LLMP-ENF--DLAKVEAN---LNHANITNWLAKLK  | 284 |
| Ci-Spn-10B | RGHFK--YA--YISELTLQVLEMDYAGK---DYSMV--LLMP-ENF--DLAKVEAN---LNHANITNWLAKLK  | 284 |
| Cs-Spn-1   | ERKFP--FN--YDSNLDLHAVELPYVGE---KYSMV--VFVPAKRY--GLEEIAKN---LTATKISELISGLF  | 273 |
| Ci-Spn-7   | KEWFN--FK--TDPDLGLKIAELFYKGG---DYSMV--VLLPDEKY--GLNKCLEK---LTSEKLOHISSGMM  | 262 |
| Ci-Spn-6   | KRFR--FN--FDQSLGLQVVEIPYIGN---KLSMV--VFLPETERF--ALNKIENA---LTHEKHGLLAGLW   | 262 |
| Ci-Spn-8   | ERKFP--FN--FDESGLQVVEIPYIGN---KLSMV--VFLPETERF--ALNKIENA---LTHEKHGLLAGLW   | 262 |

|            |                                                                            |     |
|------------|----------------------------------------------------------------------------|-----|
| Hs-A1AT    | -----RRSASLHLPKLSITGTY-DLKSVLGQLGITKVFNSG-ADLSCVTE--EAPLKLKSKAVHKAVLTI     | 340 |
| Ci-Spn-4   | -----DGNVELHLPKFEELKSNL-DLKSVLRSEGLTEPFNRRTTADYSTMTS---ROLAISKLFQOTASISM   | 385 |
| Ci-Spn-3   | M-----FRITHFKMLIELSHKT-DVKEVLQTLGVVDLFDSGASNLTGIST--VEQLVYSEFTQKAYINV      | 346 |
| Cs-Spn-5   | T-----KQLVEMSPVFRLSKKI-DVKDVIIRSMGVRDLFTSARANLSAISD--EYLYVSDFTODSFLOV      | 380 |
| Ci-Spn-5   | -----NISVTIRLPKFRLEYET-DLKEETLYNMGIQSLFSRGEADLSGIST--NGDLISLGSAAHKKTFIQV   | 360 |
| Ci-Spn-1   | TRRGNRQ--QQLCSVKLPKFKVDYAE-NLKEVLLKGLGIDIFISIN-ADFSRLSVRNNRELYVSEARHSAVLSA | 395 |
| Cs-Spn-4   | -----QQLCSLKLPKFKVDVAK-SLNSVLRGVGLLDVFDPNLADMSRMTSGGIRELYVSEARHSAVLRA      | 359 |
| Ci-Spn-2   | TGYRNMPIPMRVCEVRMPKFKITHSVDDLMGAMRAMNVTDLFESTE-ADFSPTMP---ELVVYVDMRHKAVIKV | 359 |
| Cs-Spn-3   | N--THYP-EMETCEVHLPKFKVHHTVDLIGALQLMNVSDFSPDDADLSLMTT---EQLVYVSDMRHQAVIKV   | 360 |
| Cs-Spn-2   | -----YKSVDLTVPKFSLEETI-HLKEVLPKMGVTDVFDKRLCDLSGISK--SSDLSVDQIIHKTVLEV      | 347 |
| Ci-Spn-9   | -----HESVDLTIKFKLEETL-QLQEVLPKMGVTDLFDROACDLTGIAN--RNNLFVDQIVHKTVLDV       | 345 |
| Ci-Spn-10A | -----YKSVDLSVPKFKLEETL-QLQEVLPKMGVTDLFDROACDLTGISK--SKDLNVDQIVHKTVLEV      | 345 |
| Ci-Spn-10B | -----YKSVDLSVPKFKLEETL-QLQEVLPKMGVTDLFDROACDLTGISK--SKDLNVDQIVHKTVLEV      | 345 |
| Cs-Spn-1   | -----EEKVNFSPKMKFEKSL-DLVEILKKNLGLVDLFEAENKALEGISK--TGELEFVSOVQHKAFIEV     | 334 |
| Ci-Spn-7   | -----RTELALSLPHMKFEKQL-DLVGSLKKLGLVDLFEKGNKSLRGISD--DGDLEFVSOVAHKAFIEV     | 323 |
| Ci-Spn-6   | -----EETLMLSLPRMKFEQDF-DLGGVLKMKGMDFDERAANFEATSG--SRDLVISKVVHKAFFIEV       | 323 |
| Ci-Spn-8   | -----EETLMLCLPRMKFEQDF-QLQEVLLKMGMDAFSKGAANFEATSG--SRDLVISKVVHKAFFIEV      | 323 |

|            |                                                                    |     |
|------------|--------------------------------------------------------------------|-----|
|            | -----RCL-----                                                      |     |
| Hs-A1AT    | DEKGTAAAGAMFLEAIPMSIPPE----VKFNKPFVFLMIEQNTKSPLEFMCKVNVNPTQK-----  | 394 |
| Ci-Spn-4   | DETGVRATSTAAFFELRSFFFR---TRINANKPFLFIIEDIHTRTPLFLGRVTDPRPL-----    | 441 |
| Ci-Spn-3   | NENGTVAASAAATVQGRSLSIP---RQVTVDRPFFIGVYQEKSNLFLFLCKVENPLEN-----    | 402 |
| Cs-Spn-5   | NEEGTVGAAATAAAILSGRSGGVA---RNFVVNRPFVFGVYNERSDSCVFLCK-----         | 429 |
| Ci-Spn-5   | DESGTTAGASYAQQGFRRVSDLD----LVFNHPFIVIIREKYTQMPMFMGRVVARPMY-----    | 413 |
| Ci-Spn-1   | DEAGVEAAGATAFGISLRSLSLQ----VTVNKPFIFALRHDPSGALIFVCKIVRPSVG-----    | 449 |
| Cs-Spn-4   | DEVGIEAAGASGMGMVFRSISKR---VTINKPFIFALRHDPTGAILFLCKVVRPGAD-----     | 413 |
| Ci-Spn-2   | NEQGVKATAATSIGLTGRSLPIR----VEINRPFMYMIRHEPTGALLFLGRVVDPTK-----     | 412 |
| Cs-Spn-3   | DELGVKATGATSIGISGRSYPTL----VQINRPFMYMIRHEATGALLFMGRIVNPK-----      | 412 |
| Cs-Spn-2   | FENGGDVLAEAEANRTPCNDRT---LFYADHPFLVIVRGRAKNAFHLFCAYKRPEGRIRSHDEL   | 409 |
| Ci-Spn-9   | NEQGSEAAATTSVRTQCDVAFN--PISFVADHPFLWAIRHROSELLIFMGRFSRPEGPLLHDEF   | 409 |
| Ci-Spn-10A | DEQGSEAAATTVRIQARSLNSR---PSFVADHPFLWAIRHROSELLIFMGRFSRPEGPLLHDEF   | 408 |
| Ci-Spn-10B | EENGGAVPQERADANQTPALDRP---VVYVDHPFIIIVRGRANNAFHLFCAYKRPAKIRSHDEL   | 407 |
| Cs-Spn-1   | DEKGTVAASAAATAVVMMLRSLVVP--PVRVTCDHFFLVIRKPKSKNILEMGRYSGP-----     | 388 |
| Ci-Spn-7   | NETGTEAAAATAMIAMQSMAMPVPPVQFNCDHPFLFLIRENPTNSVLFGRCSDP-----        | 380 |
| Ci-Spn-6   | NEEGSEAAAATAVVMMLRSMPA--PPVMVNCDHFFLVIRHNOKTKTILELGRFSGP-----      | 377 |
| Ci-Spn-8   | NEEGSEAAAATAVVVKARSMPCCL--PEMVNCDHPFLFLIRENPTKTKTILELGRFSGPSI----- | 379 |

Motif II

Motif III
